# Supplementary material for: The VAX2-LINC01189-hnRNPF signaling axis regulates cell invasion and migration in gastric cancer
Source: PubMed Central journal article supplement (PMC10590441; doi:10.1038/s41420-023-01688-4), 2023-10-21

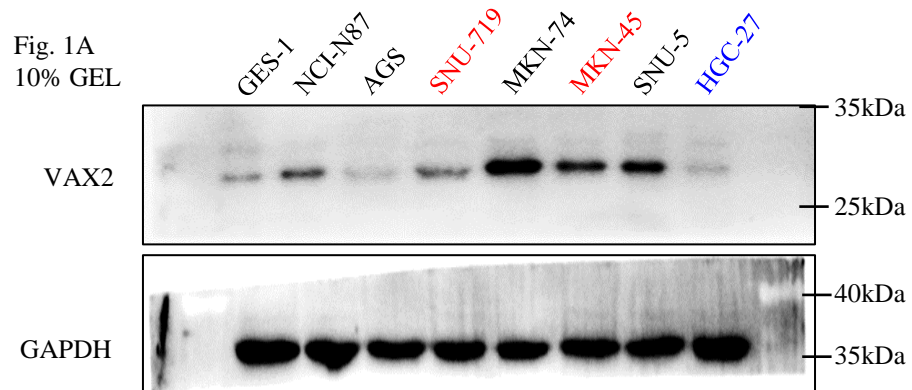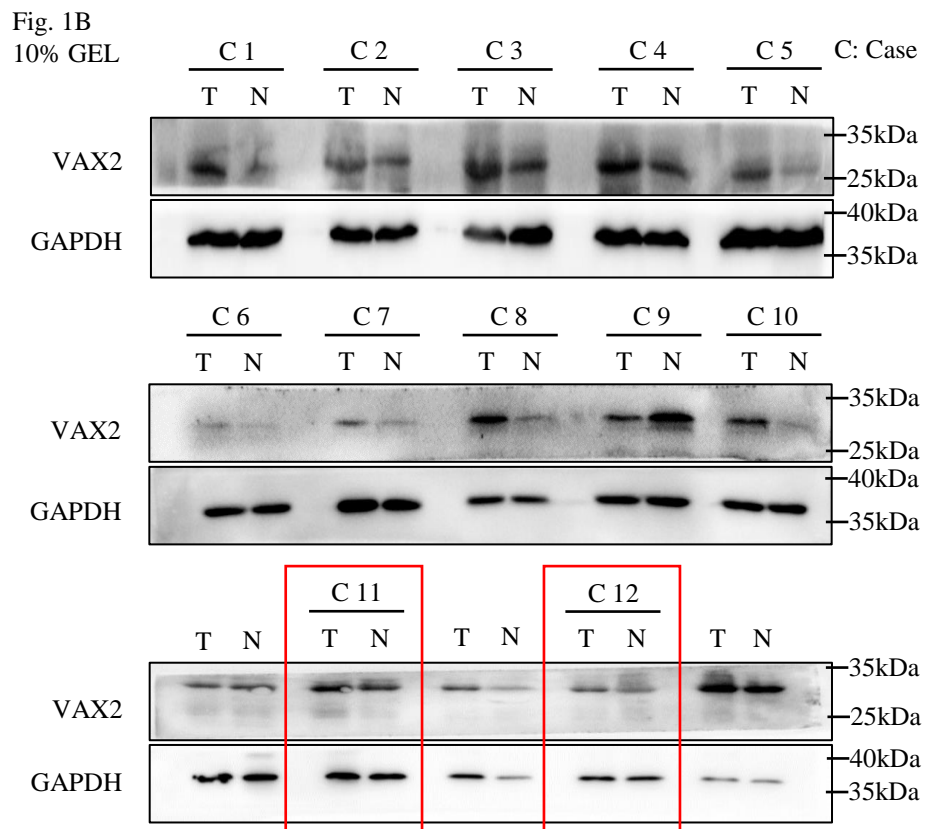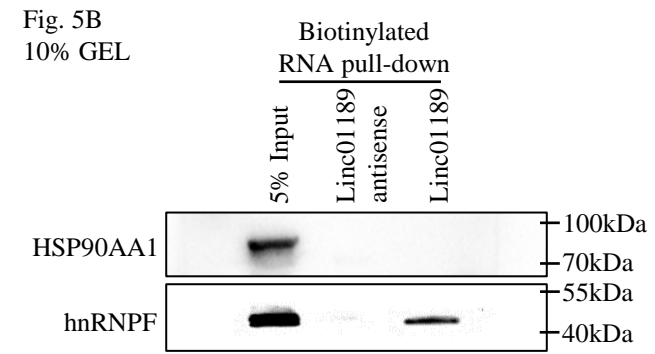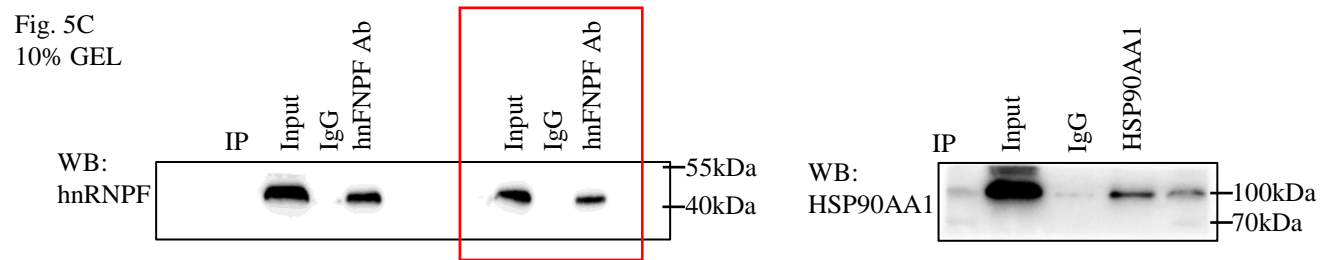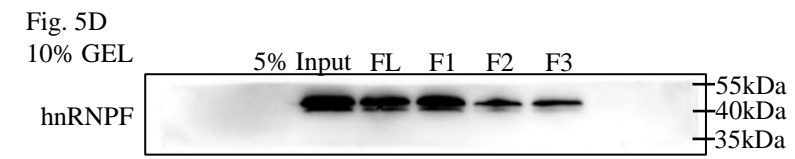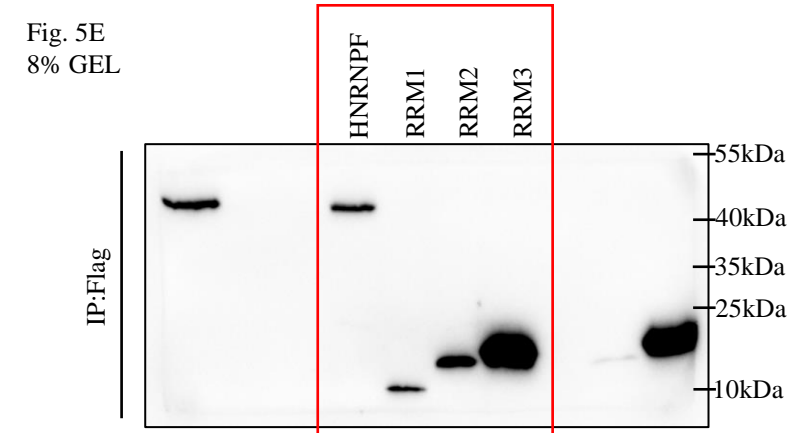

Fig. 5G1/2  
10% GEL

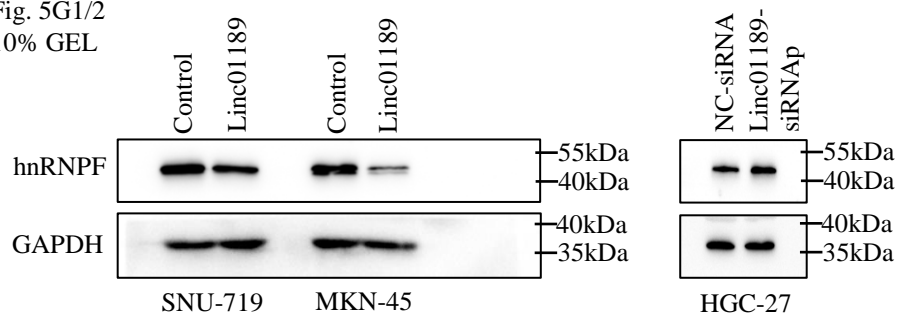

Fig. 5I1  
10% GEL

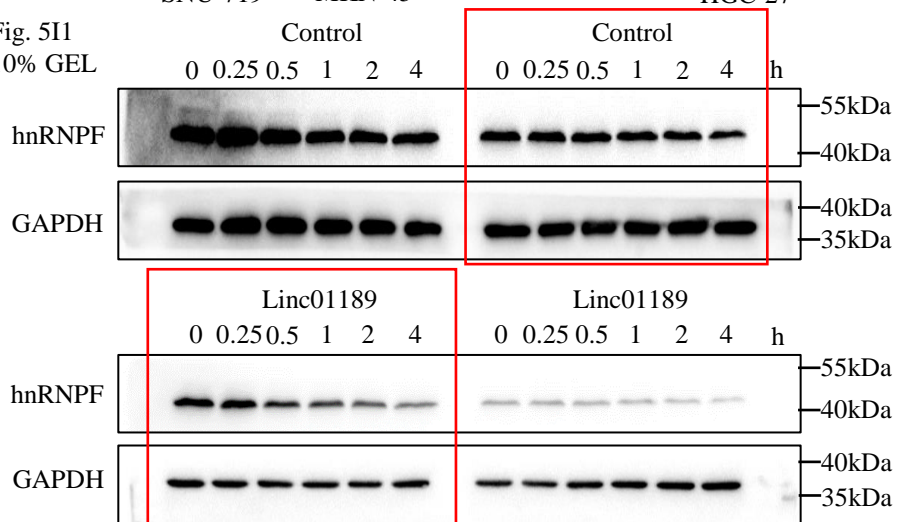

Fig. 6A1/2  
10% GEL

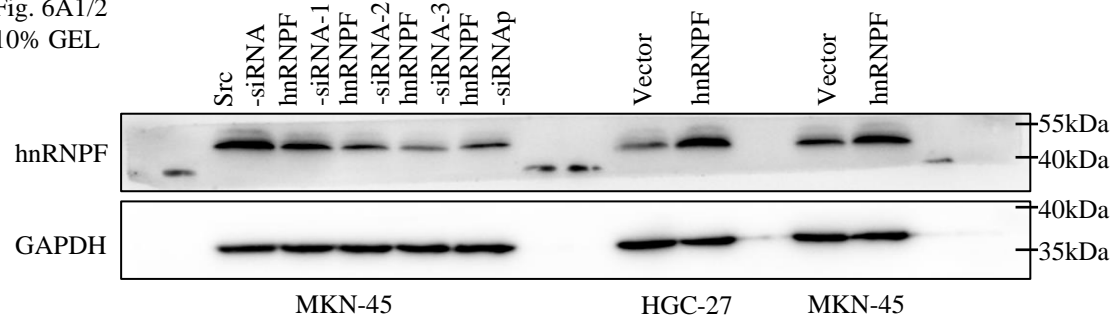

Fig. 6A2  
10% GEL

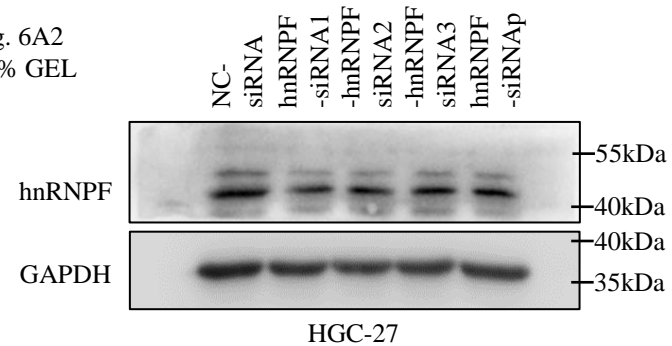

Fig. 5K  
10% GEL

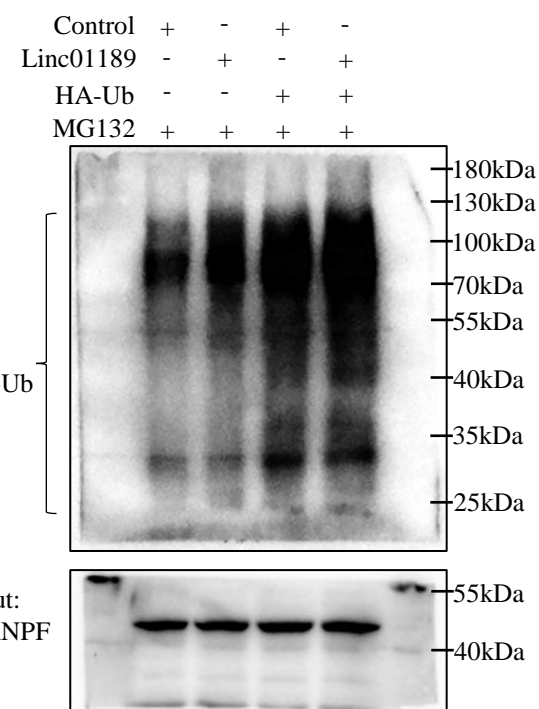

Fig. 5J1  
10% GEL

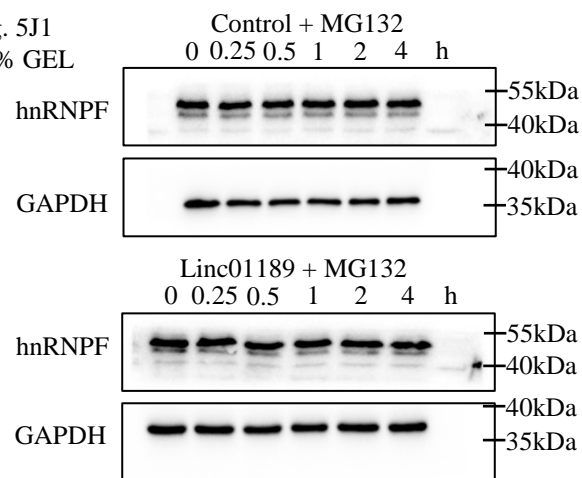

Fig. 7A1/2  
10% GEL

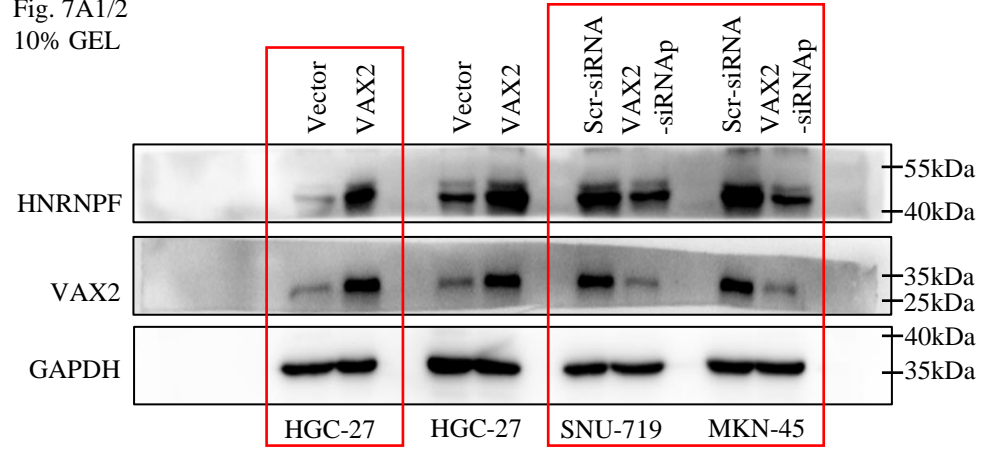

Fig. 7B1/2  
10% GEL

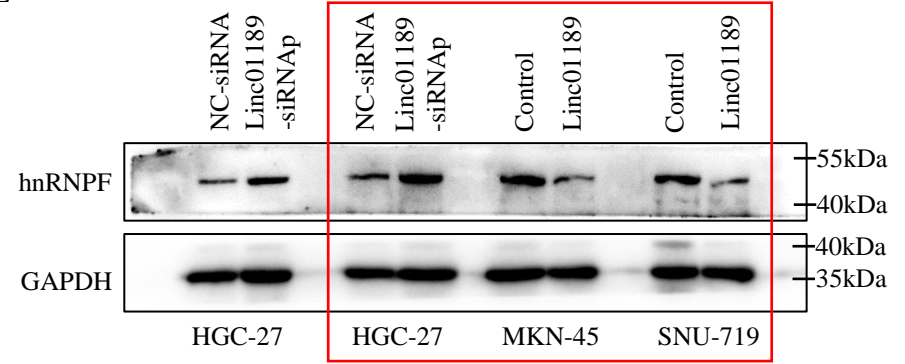

Fig. 7C1  
10% GEL

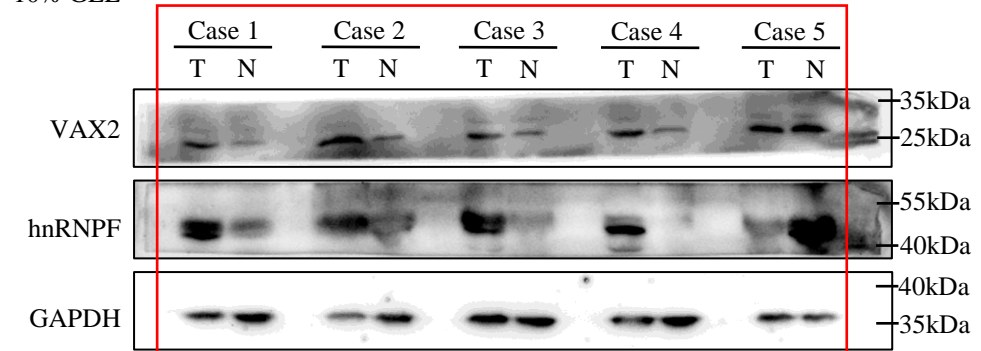

Fig. 7C1  
10% GEL

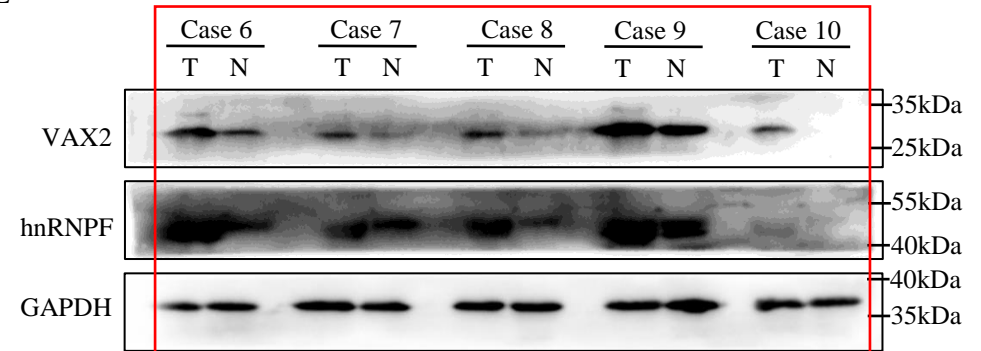

Fig. 7C1  
10% GEL

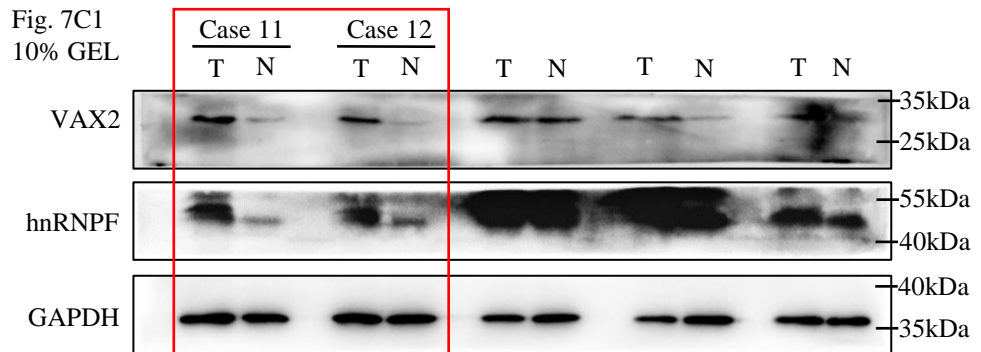

Fig. S2C1/2  
10% GEL

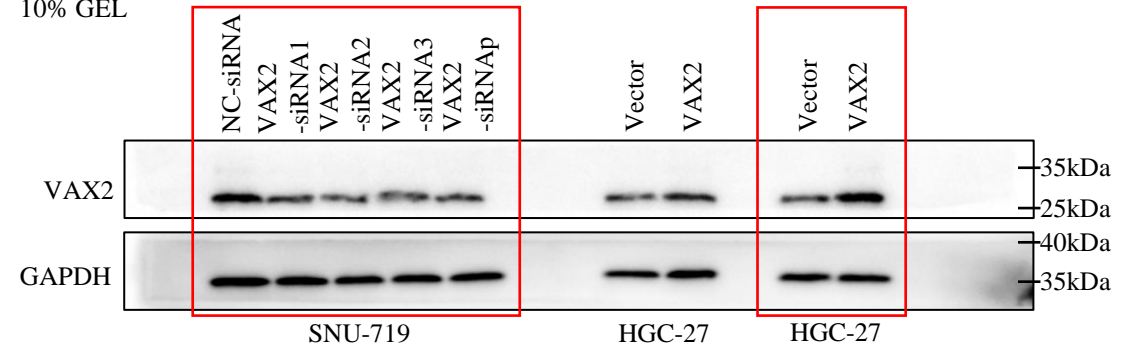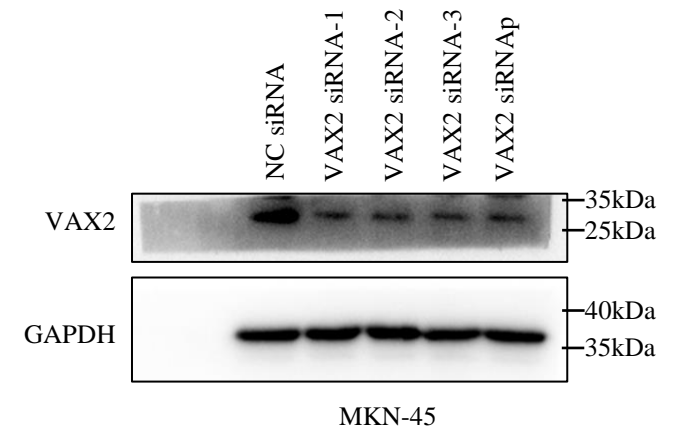

Supplement: 41420_2023_1688_MOESM6_ESM.pdf [file 41420_2023_1688_MOESM6_ESM.pdf]
